# Supplementary material
Source: PubMed Central journal article supplement (PMC3255573)

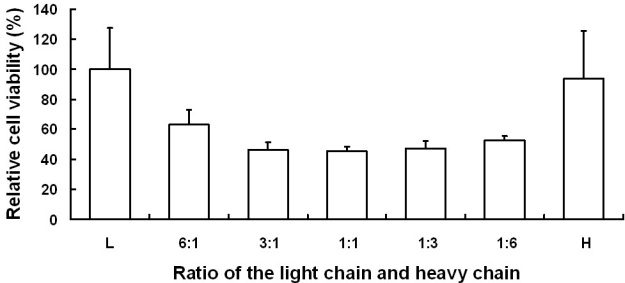

Supplement: mt2011197x1.pdf [file mt2011197x1.pdf]
